# Supplementary material for: Distinctly different reactivity of bis(silylenyl)-versus phosphanyl-silylenyl-substituted o-dicarborane towards O2, N2O and CO2
Source: Royal Society of Chemistry journal article supplement (doi:10.1039/d1cc01939b), 2021-01-01
Supplement: d1cc01939b1.pdf [file d1cc01939b1.pdf]

## Distinct different reactivity of bis(silylenyl)- versus phosphanyl-silylenyl- substituted *o*-dicarborane towards O<sub>2</sub>, N<sub>2</sub>O and CO<sub>2</sub>

Yun Xiong,<sup>a</sup> Shenglai Yao,<sup>a</sup> Ales Ruzika,<sup>b</sup> and Matthias Driess<sup>a,\*</sup>

<sup>a</sup>Metalorganics and Inorganic Materials, Department of Chemistry, Technische Universität Berlin, Straße des 17. Juni 135, Sekr. C2, 10623 Berlin, Germany.

<sup>b</sup>Department of General and Inorganic Chemistry, Faculty of Chemical Technology, University of Pardubice, Studentska 573, 532 10 Pardubice, Czech Republic

### Table of Content

|                                                              |    |
|--------------------------------------------------------------|----|
| <b>A. Experimental Section</b>                               | 2  |
| A1. General Considerations                                   | 2  |
| A2. Single-Crystal X-ray Structure Determination             | 2  |
| A3. Synthesis and Characterization                           | 2  |
| A4. Details of the Single Crystal X-ray Diffraction Analyses | 6  |
| <b>B. References</b>                                         | 19 |

## A. Experimental Section

### A1. General Considerations

All experiments and manipulations were carried out under dry nitrogen using standard Schlenk techniques or in an MBraun inert atmosphere dry box containing an atmosphere of purified N<sub>2</sub>. Solvents were deoxygenated and dried by standard methods, saturated with purified N<sub>2</sub> and freshly distilled prior to use. The precursor compounds [CH<sub>2</sub>N(*t*Bu)]<sub>2</sub>PCl **1** and [PhC(N(*t*Bu))<sub>2</sub>]SiCl, **2** **1** **3** and **3** **4** were prepared according to literature procedure. The <sup>1</sup>H, <sup>13</sup>C, <sup>31</sup>P, <sup>11</sup>B, <sup>29</sup>Si-NMR spectra were recorded on Bruker ARX200, AV 400, AV500 spectrometers referenced to residual solvent signals as internal standards (<sup>1</sup>H and <sup>13</sup>C{<sup>1</sup>H}) or with an external reference (SiMe<sub>4</sub> for <sup>29</sup>Si, 85% H<sub>3</sub>PO<sub>4</sub> for <sup>31</sup>P, and BF<sub>3</sub>·OEt<sub>2</sub> for <sup>11</sup>B). Abbreviations: *s* = singlet; *d* = doublet; *t* = triplet; *sept* = septet; *m* = multiplet; *br* = broad. IR spectra were measured with a Nicolet iS5 FT-IR Spectrometer from the company of Thermo Scientific. Elemental analyses and ESI-MS were performed by the analytical labor and MS-Service in the Institute of Chemistry, Technical University of Berlin, Germany. Melting points were measured on a Stuart SMP30 melting point apparatus.

### A2. Single-Crystal X-ray Structure Determinations

Crystals were each mounted on a glass capillary in per-fluorinated oil and measured in a cold N<sub>2</sub> flow. The data of **2**, **4** - **7** were collected on an Oxford Diffraction Supernova, Single source at offset, Atlas at 150 K (Cu- K $\alpha$ -radiation,  $\lambda$  = 1.5418 Å). The structures were solved by direct method and refined on F2 with the SHELX-97 <sup>5</sup> software package. The positions of the H atoms were calculated and considered isotropically according to a riding model. CCDC 2075598 (compound **2**), 2075596 (compound **4**), 2075600 (compound **5**), 2075599 (compound **6**), and 2075597 (compound **7**) contain the supplementary crystallographic data for this paper. These data can be obtained free of charge by contacting The Cambridge Crystallographic Data Centre, 12, Union Road, Cambridge CB2 1EZ, UK; fax: +44 1223 336033.

### A3. Synthesis and Characterization

Compound CB-Si<sub>2</sub>O<sub>2</sub> (**2**): A solution of CB-SiSi (**1**) (0.35, 0.44 mmol) in Et<sub>2</sub>O was cooled to -20 °C. The N<sub>2</sub> atmosphere in the flask was exchanged to O<sub>2</sub>. The reaction mixture was slowly warmed to room temperature, after 16h the volatiles were removed under vacuum and the residue was washed with *n*-hexane and extracted with toluene. From toluene at -20 °C colorless crystals of **2** were formed. The crystals were isolated via filtration and dried under vacuum (0.30 g, 0.37 mmol, 85%). Under same reaction conditions, the reactions of **1** with N<sub>2</sub>O or CO<sub>2</sub> yielded also **2** as the exclusive product. M. p. 253 °C (decomp.). <sup>1</sup>H NMR (500.25 MHz, THF-*d*<sub>8</sub>, 298 K):  $\delta$  (ppm) = 1.22, 1.23 (*s*, 18 H; Si-NC(CH<sub>3</sub>)<sub>3</sub>), 7.12 – 7.63 (*m*, 5 H; *Ph*); <sup>13</sup>C{<sup>1</sup>H} NMR (125.79 MHz, THF-*d*<sub>8</sub>, 298 K):  $\delta$  (ppm) = 33.1 (*s*, Si-NC(CH<sub>3</sub>)<sub>3</sub>), 56.2 (*s*, Si-NCMe<sub>3</sub>), 80.6 (*cage*-C), 129.5, 129.6, 130.4, 131.3 (*Ph*), 131.9, 134.0 (quaternary *Ph*), 181.5 (NCN); <sup>29</sup>Si{<sup>1</sup>H} NMR (99.39 MHz, THF-*d*<sub>8</sub>, 298 K):  $\delta$  (ppm) = -98.6 (*br*); <sup>11</sup>B{<sup>1</sup>H} NMR (64.21 MHz, THF-*d*<sub>8</sub>, 298 K):  $\delta$  (ppm) = -17.7 – 0.7 (*br*); ESI-MS: *m/z*: 693.50059 (calc. 693.50177 [M]<sup>+</sup>); Elemental analysis calcd (%) for C<sub>32</sub>H<sub>56</sub>N<sub>4</sub>B<sub>10</sub>Si<sub>2</sub>O<sub>2</sub>·C<sub>7</sub>H<sub>8</sub> (785.23 g/mol): C 59.65, H 8.21, N 7.14, found: C 59.03, H 8.29, N 7.00. IR (KBr, cm<sup>-1</sup>): 2970(w), 2547(m), 1528(w), 1480(w), 1445(m), 1420(s),

1394(s), 1362(s), 1193(s), 1086(m), 1069(m), 1024(w), 976(w), 923(w), 848(w), 780(vs), 728(vs), 704(vs), 693(s), 638(m), 578(m), 560(m).

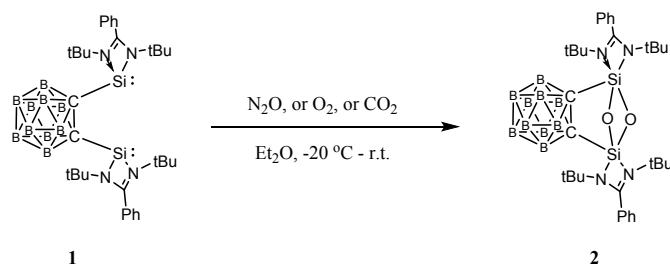

**Scheme S1** Reactions of **1** with  $N_2O$ ,  $O_2$ , or  $CO_2$  affording **2**.

Compound CB-PSiO<sub>2</sub> (**4**): A solution of CB-PSi (**3**) (0.39 g, 0.65 mmol) in diethyl ether (15 ml) was cooled to -20 °C. The  $N_2$  atmosphere in the flask was exchanged to  $O_2$ . The reaction mixture was stored at refrigerator (-20 °C). After 16 h colorless crystals of **4** were formed. The collected crystals of **4** amounted to 0.28 g (0.44 mmol, 68%). M.p. 153 °C (decomp.). <sup>1</sup>H NMR (500.25 MHz, THF-*d*<sub>8</sub>, 253 K):  $\delta$  (ppm) = 1.32 (*s*, 18 H; Si-NC(CH<sub>3</sub>)<sub>3</sub>), 1.45 (*s*, 18 H; P-NC(CH<sub>3</sub>)<sub>3</sub>), 1.95 – 3.13 (*br*, 10 H; BH), 3.27 – 3.33 (*m*, 2 H; CH<sub>2</sub>), 3.56 – 3.62 (*m*, 2 H; CH<sub>2</sub>), 7.45 – 7.80 (*m*, 5 H; Ph); <sup>31</sup>P{<sup>1</sup>H} NMR (202.50 MHz, THF-*d*<sub>8</sub>, 253 K):  $\delta$  (ppm) = 26.4; <sup>13</sup>C{<sup>1</sup>H} NMR (125.78 MHz, THF-*d*<sub>8</sub>, 253 K):  $\delta$  (ppm) = 28.6 (*d*, <sup>3</sup>*J*<sub>(P,C)</sub> = 2.3 Hz; P-NC(CH<sub>3</sub>)<sub>3</sub>), 30.6 (*s*, Si-NC(CH<sub>3</sub>)<sub>3</sub>), 41.0 (*d*, <sup>2</sup>*J*<sub>(P,C)</sub> = 14.1 Hz; P-N-CH<sub>2</sub>), 55.5 (*s*, Si-N(CMe<sub>3</sub>)<sub>3</sub>), 56.2 (*d*, <sup>2</sup>*J*<sub>(P,C)</sub> = 4.9 Hz; P-N(CMe<sub>3</sub>)), 75.9 (*d*, <sup>1</sup>*J*<sub>(P,C)</sub> = 7.6 Hz; cage C), 88.5 (*d*, <sup>2</sup>*J*<sub>(P,C)</sub> = 121.9 Hz; cage C), 128.1 (*Ph*), 128.2 (*Ph*), 128.6 (*Ph*), 128.6 (*Ph*), 129.1 (quaternary *Ph*), 131.3 (*Ph*), 181.4 (NCN); <sup>29</sup>Si{<sup>1</sup>H} NMR (99.38 MHz, THF-*d*<sub>8</sub>, 253 K):  $\delta$  (ppm) = -52.8 (*br*); <sup>11</sup>B{<sup>1</sup>H} NMR (64.21 MHz, THF-*d*<sub>8</sub>, 298 K):  $\delta$  (ppm) = -14.2 - 1.2 (*br*) Elemental analysis calcd (%) for C<sub>27</sub>H<sub>55</sub>N<sub>4</sub>SiPB<sub>10</sub>O<sub>2</sub> (634.92): C 51.08, H 8.73, N 8.82, found: C 50.83, H 8.30, N 8.94. IR (KBr, cm<sup>-1</sup>): 2970(m), 2569(m), 1477(w), 1445(w), 1394(s), 1366(s), 1267(m), 1193(vs), 1022(vs), 799(m), 770(m), 735(m), 704(s), 651(s).

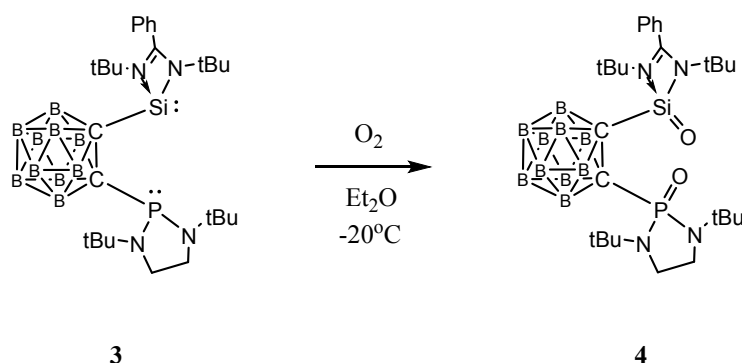

**Scheme S2** Reaction of **3** with  $O_2$  to give **4**.

Compound CB-PSiO (**5**): A solution of CB-PSi (**3**) (0.38 g, 0.63 mmol) in Et<sub>2</sub>O was cooled to -20 °C. The  $N_2$  atmosphere in the flask was exchanged to  $N_2O$ . The reaction solution was stored at -20 °C. After 20 min

colorless crystals of **5** were formed. At -20 °C the crystals were isolated via filtration and dried under vacuum (0.20 g, 0.32 mmol, 51%). M. p. 176 °C (decomp.). <sup>1</sup>H NMR (500.25 MHz, THF-*d*<sub>8</sub>, 243 K): δ (ppm) = 1.29 (s, 18 H; Si-NC(CH<sub>3</sub>)<sub>3</sub>), 1.35 (*br*, 18 H; P-NC(CH<sub>3</sub>)<sub>3</sub>), 1.87 – 3.08 (*br*, 10 H, *BH*), 3.25 – 3.30 (*m*, 2 H; *CH*<sub>2</sub>), 3.36 – 3.39 (*m*, 2 H; *CH*<sub>2</sub>), 7.43 – 7.85 (*m*, 5 H; *Ph*); <sup>31</sup>P {<sup>1</sup>H} NMR (202.50 MHz, THF-*d*<sub>8</sub>, 243 K): δ (ppm) = 114.2; <sup>13</sup>C {<sup>1</sup>H} NMR (125.79 MHz, THF-*d*<sub>8</sub>, 243 K): δ (ppm) = 29.9 (*d*, <sup>3</sup>*J*<sub>(P,C)</sub> = 9.3 Hz; P-NC(CH<sub>3</sub>)<sub>3</sub>), 30.4 (*s*, Si-NC(CH<sub>3</sub>)<sub>3</sub>), 47.6 (*d*, <sup>2</sup>*J*<sub>(P,C)</sub> = 7.3 Hz; P-N-CH<sub>2</sub>), 54.8 (*d*, <sup>2</sup>*J*<sub>(P,C)</sub> = 27.3 Hz; P-NCMe<sub>3</sub>), 55.3 (*s*, Si-NCMe<sub>3</sub>), 75.8 (*d*, <sup>2</sup>*J*<sub>(P,C)</sub> = 8.0 Hz; cage C), 96.9 (*d*, <sup>1</sup>*J*<sub>(P,C)</sub> = 140.9 Hz; cage C), 128.1 (*br*, *Ph*), 128.3 (*Ph*), 128.6 (*Ph*), 129.2 (quaternary *Ph*), 131.2 (*Ph*), 181.0 (NCN); <sup>29</sup>Si {<sup>1</sup>H} NMR (99.39 MHz, THF-*d*<sub>8</sub>, 243 K): δ (ppm) = -51.9 (*br*.); <sup>11</sup>B {<sup>1</sup>H} NMR (64.21 MHz, THF-*d*<sub>8</sub>, 298 K): δ (ppm) = -15.9 - -1.4 (*br*); Elemental analysis calcd (%) for C<sub>27</sub>H<sub>55</sub>N<sub>4</sub>SiPB<sub>10</sub>O (618.92 g/mol): C 52.40, H 8.96, N 9.05, found: C 52.01, H 8.53, N 8.89 IR (KBr, cm<sup>-1</sup>): 2970(*m*), 2565(*m*), 1391(*vs*), 1363(*s*), 1187(*vs*), 1154(*m*), 1095(*m*), 1070(*m*), 962(*m*), 798(*m*), 772(*s*), 766(*s*), 734(*m*), 7145(*s*), 645(*m*), 635(*s*), 614(*w*).

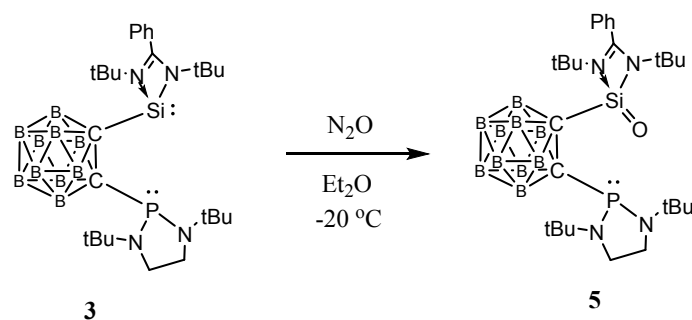

**Scheme S3** Reaction of **3** with N<sub>2</sub>O to form **5**.

**Compound CB-PSi(O<sub>2</sub>C=O) (6)**: A solution of **3** (0.47 g, 0.78 mmol) in diethyl ether (15 ml) was cooled to -20 °C. The N<sub>2</sub> atmosphere in the flask was exchanged to CO<sub>2</sub>. After 30 min colorless crystals of **6** were formed from the resulted solution and rapidly isolated via filtration. The collected crystals of **6** amounted to 0.39 g (0.60 mmol, 77 %). M.p. 263 °C (decomp.). <sup>1</sup>H NMR (500.25 MHz, THF-*d*<sub>8</sub>, 273 K): δ (ppm) = 1.21 (*s*, 18 H; Si-NC(CH<sub>3</sub>)<sub>3</sub>), 1.34 (*br*, 18 H; P-NC(CH<sub>3</sub>)<sub>3</sub>), 1.86 – 3.17 (*br*, 10 H; *BH*), 3.27 – 3.33 (*m*, 2 H; *CH*<sub>2</sub>), 3.42 – 3.46 (*m*, 2 H; *CH*<sub>2</sub>), 7.40 – 7.76 (*m*, 5 H; *Ph*); <sup>31</sup>P {<sup>1</sup>H} NMR (200.13 MHz, THF-*d*<sub>8</sub>, 273 K): δ (ppm) = 115.5; <sup>13</sup>C {<sup>1</sup>H} NMR (125.79 MHz, THF-*d*<sub>8</sub>, 263 K): δ (ppm) = 31.5 (*d*, <sup>3</sup>*J*<sub>(P,C)</sub> = 8.2 Hz; P-NC(CH<sub>3</sub>)<sub>3</sub>), 32.1 (*s*, Si-NC(CH<sub>3</sub>)<sub>3</sub>), 49.2 (*d*, <sup>2</sup>*J*<sub>(P,C)</sub> = 8.6 Hz; P-N-CH<sub>2</sub>), 56.7 (*d*, <sup>2</sup>*J*<sub>(P,C)</sub> = 25.8 Hz; P-NCMe<sub>3</sub>), 57.4 (*s*, Si-NCMe<sub>3</sub>), 77.8 (*d*, <sup>2</sup>*J*<sub>(P,C)</sub> = 14.7 Hz; cage C), 99.6 (*d*, <sup>1</sup>*J*<sub>(P,C)</sub> = 127.7 Hz; cage C), 127.1, 128.3, 128.5, 128.9, 130.2 (quaternary *Ph*), 131.1 (*Ph*), 149.8 (CO<sub>3</sub>), 181.1 (NCN); <sup>29</sup>Si {<sup>1</sup>H} NMR (99.38 MHz, THF-*d*<sub>8</sub>, 273 K): δ (ppm) = -93.1; <sup>11</sup>B {<sup>1</sup>H} NMR (64.21 MHz, THF-*d*<sub>8</sub>, 298 K): δ (ppm) = -15.2 – 2.0 (*br*); Elemental analysis calcd (%) for C<sub>28</sub>H<sub>55</sub>N<sub>4</sub>SiPO<sub>3</sub>B<sub>10</sub> (662.93): C 50.73, H 8.36, N 8.45, found: C 50.05, H 8.56, N 8.62. IR (KBr, cm<sup>-1</sup>): 2971(*w*), 2611(*w*), 2577(*w*), 1813(*vs*, ν<sub>CO</sub>), 1409(*s*), 1399(*s*), 1368(*s*), 1360(*m*), 1196(*vs*), 1092(*m*), 1072(*w*), 1004(*m*), 866(*s*), 787(*vs*), 775(*m*), 748(*m*), 740(*m*), 705(*s*), 678(*m*), 660(*s*), 632(*w*), 577(*m*), 561(*w*).

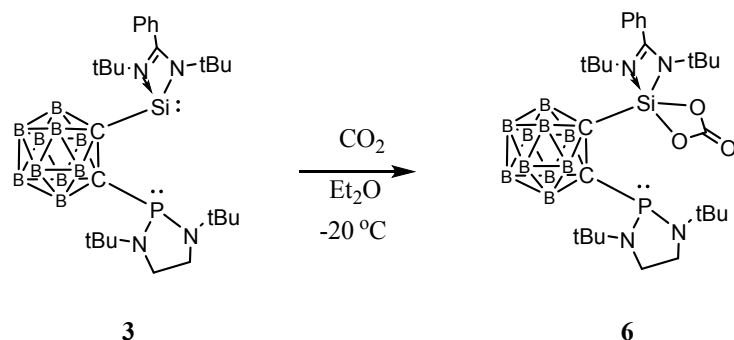

**Scheme S4** Reaction of **3** with CO<sub>2</sub> affording **6**.

Compound **7**: A solution of **6** in diethyl ether was allowed to stand at room temperature. After 24 h compound **6** isomerized to **7** completely, the latter crystallized as colorless crystals. M.p. 274 °C (decomp.). <sup>1</sup>H NMR (200.13 MHz, THF-*d*<sub>8</sub>, 298K): δ (ppm) = 1.20 (*s*, 9 H; Si-NC(CH<sub>3</sub>)<sub>3</sub>), 1.23 (*s*, 9 H; Si-NC(CH<sub>3</sub>)<sub>3</sub>), 1.34 (*d*, <sup>3</sup>*J*<sub>(H,P)</sub> = 1.0 Hz, 9 H; P-NC(CH<sub>3</sub>)<sub>3</sub>), 1.38 (*d*, <sup>3</sup>*J*<sub>(H,P)</sub> = 1.1 Hz, 9 H; P-NC(CH<sub>3</sub>)<sub>3</sub>), 3.22 – 3.38 (*m*, 4 H; CH<sub>2</sub>), 7.51 – 7.65 (*m*, 5 H; *Ph*); <sup>31</sup>P {<sup>1</sup>H} NMR (81.01 MHz, THF-*d*<sub>8</sub>, 298 K): δ (ppm) = 119.6; <sup>13</sup>C {<sup>1</sup>H} NMR (50.32 MHz, THF-*d*<sub>8</sub>, 298 K): δ (ppm) = 31.3 (*d*, <sup>3</sup>*J*<sub>(P,C)</sub> = 7.5 Hz; P-NC(CH<sub>3</sub>)<sub>3</sub>), 31.5 (*d*, <sup>3</sup>*J*<sub>(P,C)</sub> = 7.5 Hz; P-NC(CH<sub>3</sub>)<sub>3</sub>), 33.0, 33.8 (*s*, Si-NC(CH<sub>3</sub>)<sub>3</sub>), 46.8 (*d*, <sup>2</sup>*J*<sub>(P,C)</sub> = 8.0 Hz; P-N-CH<sub>2</sub>), 47.4 (*d*, <sup>2</sup>*J*<sub>(P,C)</sub> = 8.0 Hz; P-N-CH<sub>2</sub>), 54.6 (*d*, <sup>2</sup>*J*<sub>(P,C)</sub> = 10.3 Hz; P-NCMe<sub>3</sub>), 54.9 (*d*, <sup>2</sup>*J*<sub>(P,C)</sub> = 13.6 Hz; P-NCMe<sub>3</sub>), 57.3, 57.4 (*s*, Si-NCMe<sub>3</sub>), 71.8, 76.3 (*s*, cage C), 129.4, 129.9, 130.2, 132.0, 132.5 (*Ph*), 133.4 (quaternary *Ph*), 159.4 (CO<sub>2</sub>), 180.6 (NCN); <sup>29</sup>Si {<sup>1</sup>H} NMR (79.49 MHz, THF-*d*<sub>8</sub>, 298 K): δ (ppm) = -110.4 (*d*, <sup>2</sup>*J*<sub>(Si,P)</sub> = 9.4 Hz); <sup>11</sup>B {<sup>1</sup>H} NMR (64.21 MHz, THF-*d*<sub>8</sub>, 298 K): δ (ppm) = -14.7 – 2.2 (*br*); Elemental analysis calcd (%) for C<sub>28</sub>H<sub>55</sub>N<sub>4</sub>SiPO<sub>3</sub>B<sub>10</sub> (662.93): C 50.73, H 8.36, N 8.45, found: C 50.35, H 8.25, N 8.46. IR (KBr, cm<sup>-1</sup>): 2966(*m*), 2594(*m*), 2580(*m*), 2552(*m*), 1740(*s*, CO), 1545(*m*), 1488(*w*), 1367(*vs*), 1280(*m*), 1249(*m*), 1219(*m*), 1188(*s*), 1130(*w*), 1075(*m*), 931(*vs*), 875(*w*), 845(*w*), 814(*m*), 800(*s*), 773(*s*), 742(*s*), 708(*s*), 679(*w*), 642(*s*), 606(*s*).

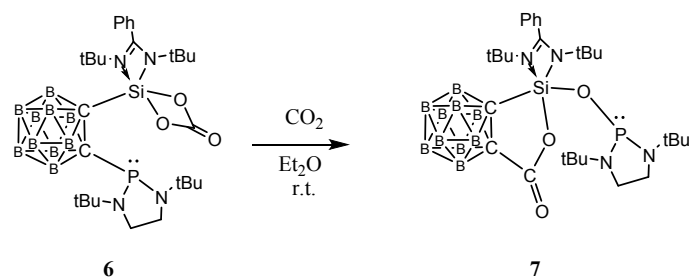

**Scheme S5** Isomerization of **6** to **7**.

#### A4. Single-Crystal X-ray Structure Determinations

Compound 2 (CCDC 2075598)

**Table S1** Crystal data and structure refinement for 2.

|                                   |                                                                                               |                   |
|-----------------------------------|-----------------------------------------------------------------------------------------------|-------------------|
| Empirical formula                 | C <sub>39</sub> H <sub>64</sub> B <sub>10</sub> N <sub>4</sub> O <sub>2</sub> Si <sub>2</sub> |                   |
| Formula weight                    | 785.22                                                                                        |                   |
| Temperature                       | 150(2) K                                                                                      |                   |
| Wavelength                        | 1.54184 Å                                                                                     |                   |
| Crystal system                    | Monoclinic                                                                                    |                   |
| Space group                       | C2/c                                                                                          |                   |
| Unit cell dimensions              | a = 15.4300(2) Å                                                                              | α = 90°.          |
|                                   | b = 20.2433(2) Å                                                                              | β = 96.0730(10)°. |
|                                   | c = 14.5257(2) Å                                                                              | γ = 90°.          |
| Volume                            | 4511.70(10) Å <sup>3</sup>                                                                    |                   |
| Z                                 | 4                                                                                             |                   |
| Density (calculated)              | 1.156 Mg/m <sup>3</sup>                                                                       |                   |
| Absorption coefficient            | 0.993 mm <sup>-1</sup>                                                                        |                   |
| F(000)                            | 1680                                                                                          |                   |
| Crystal size                      | 0.300 x 0.230 x 0.170 mm <sup>3</sup>                                                         |                   |
| Theta range for data collection   | 3.615 to 67.497°.                                                                             |                   |
| Index ranges                      | -17 ≤ h ≤ 18, -13 ≤ k ≤ 24, -17 ≤ l ≤ 17                                                      |                   |
| Reflections collected             | 14505                                                                                         |                   |
| Independent reflections           | 4072 [R(int) = 0.0203]                                                                        |                   |
| Completeness to theta = 67.497°   | 100.0 %                                                                                       |                   |
| Absorption correction             | Semi-empirical from equivalents                                                               |                   |
| Max. and min. transmission        | 1.00000 and 0.65064                                                                           |                   |
| Refinement method                 | Full-matrix least-squares on F <sup>2</sup>                                                   |                   |
| Data / restraints / parameters    | 4072 / 120 / 296                                                                              |                   |
| Goodness-of-fit on F <sup>2</sup> | 1.052                                                                                         |                   |
| Final R indices [I > 2σ(I)]       | R1 = 0.0447, wR2 = 0.1232                                                                     |                   |
| R indices (all data)              | R1 = 0.0466, wR2 = 0.1257                                                                     |                   |
| Extinction coefficient            | n/a                                                                                           |                   |
| Largest diff. peak and hole       | 0.585 and -0.325 e.Å <sup>-3</sup>                                                            |                   |

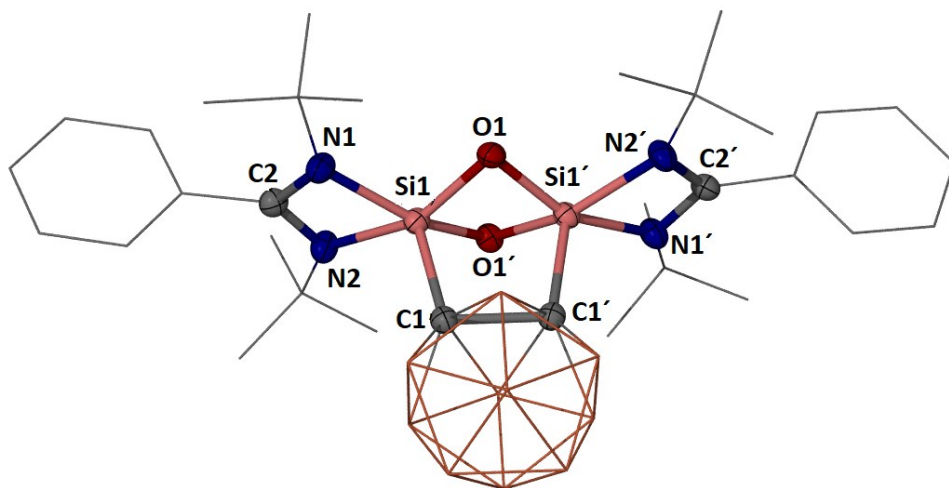

**Fig. S1.** Molecular Structure of **2**. Thermal ellipsoids are drawn at 50% probability level. Hydrogen atoms are omitted for clarity.

**Table S2** Bond lengths [ $\text{\AA}$ ] and angles [ $^\circ$ ] for **2**.

|            |          |
|------------|----------|
| Si1-O1     | 1.695(1) |
| Si1-O1'    | 1.708(1) |
| Si1-N1     | 1.861(1) |
| Si1-N2     | 1.884(1) |
| Si1-C1     | 1.961(2) |
| Si1-C2     | 2.332(2) |
| Si1-Si1'   | 2.403(1) |
| O1-Si1'    | 1.708(1) |
| N1-C2      | 1.332(2) |
| C1-C1'     | 1.687(3) |
| N2-C2      | 1.335(2) |
|            |          |
| O1-Si1-O1' | 83.4(1)  |
| O1-Si1-N1  | 154.4(1) |
| O1'-Si1-N1 | 98.3(1)  |
| O1-Si1-N2  | 98.3(1)  |
| O1'-Si1-N2 | 155.0(1) |
| N1-Si1-N2  | 69.7(1)  |
| O1-Si1-C1  | 96.6(1)  |
| O1'-Si1-C1 | 96.1(1)  |
| N1-Si1-C1  | 108.6(1) |
| N2-Si1-C1  | 108.4(1) |
| O1-Si1-C2  | 130.0(1) |

|              |          |
|--------------|----------|
| O1-Si1-C2    | 130.1(1) |
| N1-Si1-C2    | 34.8(1)  |
| N2-Si1-C2    | 34.9 (1) |
| C1-Si1-C2    | 112.0(1) |
| O1-Si1-Si1'  | 45.3(1)  |
| O1'-Si1-Si1' | 44.9(1)  |
| N1-Si1-Si1'  | 143.1(1) |
| N2-Si1-Si1'  | 143.6(1) |
| C1-Si1-Si1'  | 79.5(1)  |
| C2-Si1-Si1'  | 168.6(1) |
| Si1-O1-Si1'  | 89.8(1)  |
| C2-N1-Si1    | 92.3(1)  |
| C1'-C1-Si1   | 100.5(1) |
| C2-N2-Si1    | 91.2(1)  |
| N1-C2-N2     | 106.8(1) |
| N1-C2-Si1    | 52.9(1)  |
| N2-C2-Si1    | 53.9(1)  |

---

Symmetry transformations used to generate equivalent atoms:  
#1 -x,y,-z+1/2

Compound 4 (CCDC 2075596)

**Table S3** Crystal data and structure refinement for 4.

|                        |                                                                                       |                  |
|------------------------|---------------------------------------------------------------------------------------|------------------|
| Empirical formula      | C <sub>29</sub> H <sub>60</sub> B <sub>10</sub> N <sub>4</sub> O <sub>2.50</sub> P Si |                  |
| Formula weight         | 671.97                                                                                |                  |
| Temperature            | 150(2) K                                                                              |                  |
| Wavelength             | 1.54184 Å                                                                             |                  |
| Crystal system         | Monoclinic                                                                            |                  |
| Space group            | P2 <sub>1</sub> /c                                                                    |                  |
| Unit cell dimensions   | a = 33.1770(9) Å                                                                      | α = 90°.         |
|                        | b = 10.4724(3) Å                                                                      | β = 100.412(3)°. |
|                        | c = 22.8239(6) Å                                                                      | γ = 90°.         |
| Volume                 | 7799.4(4) Å <sup>3</sup>                                                              |                  |
| Z                      | 8                                                                                     |                  |
| Density (calculated)   | 1.145 Mg/m <sup>3</sup>                                                               |                  |
| Absorption coefficient | 1.166 mm <sup>-1</sup>                                                                |                  |
| F(000)                 | 2888                                                                                  |                  |
| Crystal size           | 0.160 x 0.090 x 0.060 mm <sup>3</sup>                                                 |                  |



|                                   |                                             |
|-----------------------------------|---------------------------------------------|
| Theta range for data collection   | 2.708 to 67.499°.                           |
| Index ranges                      | -31<=h<=39, -12<=k<=12, -27<=l<=27          |
| Reflections collected             | 53977                                       |
| Independent reflections           | 14060 [R(int) = 0.1289]                     |
| Completeness to theta = 67.499°   | 100.0 %                                     |
| Absorption correction             | Semi-empirical from equivalents             |
| Max. and min. transmission        | 1.00000 and 0.57714                         |
| Refinement method                 | Full-matrix least-squares on F <sup>2</sup> |
| Data / restraints / parameters    | 14060 / 0 / 882                             |
| Goodness-of-fit on F <sup>2</sup> | 1.027                                       |
| Final R indices [I>2sigma(I)]     | R1 = 0.0668, wR2 = 0.1418                   |
| R indices (all data)              | R1 = 0.1325, wR2 = 0.1823                   |
| Extinction coefficient            | n/a                                         |
| Largest diff. peak and hole       | 0.506 and -0.340 e.Å <sup>-3</sup>          |

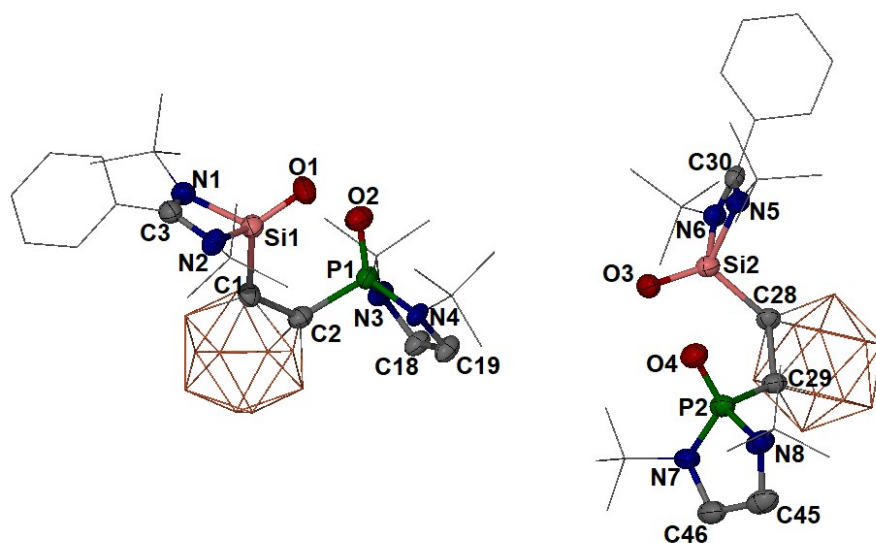

**Fig. S2** Molecular Structure of **4**. Thermal ellipsoids are drawn at 50% probability level. Hydrogen atoms are omitted for clarity. Bond lengths [Å] and angles [°] for **4**.

**Table S4** Crystal data and structure refinement for **4**.

|        |          |
|--------|----------|
| P1-O2  | 1.456(3) |
| P1-N3  | 1.638(3) |
| P1-N4  | 1.656(3) |
| P1-C2  | 1.899(4) |
| Si1-O1 | 1.524(3) |
| Si1-N2 | 1.814(3) |
| Si1-N1 | 1.820(3) |

|           |          |
|-----------|----------|
| Si1-C1    | 1.943(4) |
| N4-C19    | 1.474(5) |
| N1-C3     | 1.339(5) |
| N2-C3     | 1.335(5) |
| N3-C18    | 1.476(5) |
| C1-C2     | 1.768(5) |
| C3-C4     | 1.487(6) |
| C18-C19   | 1.544(5) |
| C4-C5     | 1.388(6) |
| Si2-O3    | 1.524(3) |
| Si2-N6    | 1.807(3) |
| Si2-N5    | 1.828(3) |
| Si2-C28   | 1.937(4) |
| P2-O4     | 1.463(3) |
| P2-N8     | 1.634(4) |
| P2-N7     | 1.673(3) |
| P2-C29    | 1.893(4) |
| N5-C30    | 1.335(5) |
| N6-C30    | 1.334(5) |
| N7-C46    | 1.469(5) |
| N8-C45    | 1.481(5) |
| C28-C29   | 1.733(5) |
| O2-P1-N3  | 117.3(2) |
| O2-P1-N4  | 121.5(2) |
| N3-P1-N4  | 98.0(2)  |
| O2-P1-C2  | 109.2(2) |
| N3-P1-C2  | 104.4(2) |
| N4-P1-C2  | 104.5(2) |
| O1-Si1-N2 | 118.5(2) |
| O1-Si1-N1 | 120.2(2) |
| N2-Si1-N1 | 72.5(2)  |
| O1-Si1-C1 | 122.5(2) |
| N2-Si1-C1 | 104.9(2) |
| N1-Si1-C1 | 107.1(2) |
| C19-N4-P1 | 111.0(3) |
| C3-N1-Si1 | 90.0(3)  |
| C3-N2-Si1 | 90.4(3)  |
| C18-N3-P1 | 111.2(3) |

|             |          |
|-------------|----------|
| C2-C1-Si1   | 126.0(2) |
| N2-C3-N1    | 107.0(4) |
| N2-C3-C4    | 126.1(4) |
| N1-C3-C4    | 126.6(4) |
| C1-C2-P1    | 124.3(2) |
| N3-C18-C19  | 107.2(3) |
| N4-C19-C18  | 108.9(3) |
| C5-C4-C3    | 124.2(4) |
| O3-Si2-N6   | 116.2(2) |
| O3-Si2-N5   | 123.0(2) |
| N6-Si2-N5   | 72.0(1)  |
| O3-Si2-C28  | 121.4(2) |
| N6-Si2-C28  | 105.2(2) |
| N5-Si2-C28  | 107.8(2) |
| O4-P2-N8    | 117.7(2) |
| O4-P2-N7    | 121.9(2) |
| N8-P2-N7    | 98.7(2)  |
| O4-P2-C29   | 108.0(2) |
| N8-P2-C29   | 104.3(2) |
| N7-P2-C29   | 104.2(2) |
| C30-N5-Si2  | 90.4(2)  |
| C30-N6-Si2  | 91.3(2)  |
| N6-C30-N5   | 106.3(3) |
| N6-C30-C31  | 127.5(4) |
| N5-C30-C31  | 126.0(3) |
| C46-N7-C51  | 115.6(3) |
| C46-N7-P2   | 109.2(3) |
| C45-N8-P2   | 109.4(3) |
| C29-C28-Si2 | 124.6(3) |
| C28-C29-P2  | 121.7(3) |
| N8-C45-C46  | 107.9(4) |
| N7-C46-C45  | 109.9(4) |

---

Symmetry transformations used to generate equivalent atoms:

**Table S5** Crystal data and structure refinement for **5**.

|                                   |                                                                       |                 |
|-----------------------------------|-----------------------------------------------------------------------|-----------------|
| Empirical formula                 | C <sub>27</sub> H <sub>55</sub> B <sub>10</sub> N <sub>4</sub> O P Si |                 |
| Formula weight                    | 618.91                                                                |                 |
| Temperature                       | 150(2) K                                                              |                 |
| Wavelength                        | 1.54184 Å                                                             |                 |
| Crystal system                    | Monoclinic                                                            |                 |
| Space group                       | I2/a                                                                  |                 |
| Unit cell dimensions              | a = 19.7759(5) Å                                                      | α = 90°.        |
|                                   | b = 9.9587(2) Å                                                       | β = 98.741(2)°. |
|                                   | c = 37.0968(11) Å                                                     | γ = 90°.        |
| Volume                            | 7221.1(3) Å <sup>3</sup>                                              |                 |
| Z                                 | 8                                                                     |                 |
| Density (calculated)              | 1.139 Mg/m <sup>3</sup>                                               |                 |
| Absorption coefficient            | 1.188 mm <sup>-1</sup>                                                |                 |
| F(000)                            | 2656                                                                  |                 |
| Crystal size                      | 0.260 x 0.180 x 0.100 mm <sup>3</sup>                                 |                 |
| Theta range for data collection   | 2.410 to 67.500°.                                                     |                 |
| Index ranges                      | -23 ≤ h ≤ 22, -9 ≤ k ≤ 11, -29 ≤ l ≤ 44                               |                 |
| Reflections collected             | 13276                                                                 |                 |
| Independent reflections           | 6495 [R(int) = 0.0356]                                                |                 |
| Completeness to theta = 67.500°   | 99.8 %                                                                |                 |
| Absorption correction             | Semi-empirical from equivalents                                       |                 |
| Max. and min. transmission        | 1.00000 and 0.63761                                                   |                 |
| Refinement method                 | Full-matrix least-squares on F <sup>2</sup>                           |                 |
| Data / restraints / parameters    | 6495 / 0 / 409                                                        |                 |
| Goodness-of-fit on F <sup>2</sup> | 1.020                                                                 |                 |
| Final R indices [I > 2σ(I)]       | R1 = 0.0448, wR2 = 0.1135                                             |                 |
| R indices (all data)              | R1 = 0.0620, wR2 = 0.1277                                             |                 |
| Extinction coefficient            | n/a                                                                   |                 |
| Largest diff. peak and hole       | 0.300 and -0.348 e.Å <sup>-3</sup>                                    |                 |

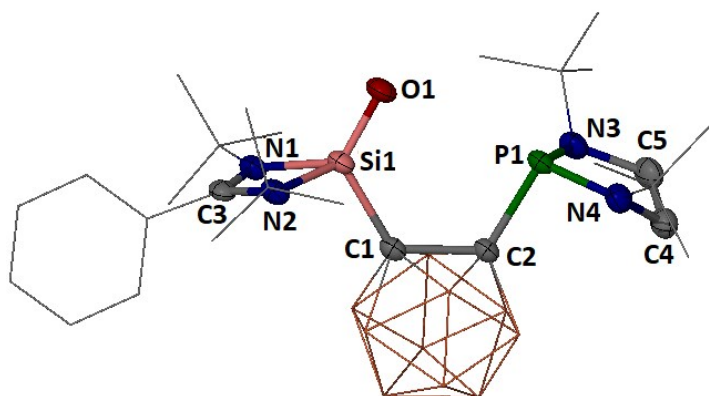

**Fig. S3** Molecular Structure of **5**. Thermal ellipsoids are drawn at 50% probability level. Hydrogen atoms are omitted for clarity.

**Table S6** Bond lengths [ $\text{\AA}$ ] and angles [ $^\circ$ ] for **5**.

|           |          |
|-----------|----------|
| P1-N4     | 1.677(2) |
| P1-N3     | 1.717(2) |
| P1-C2     | 1.949(2) |
| Si1-O1    | 1.524(1) |
| Si1-N2    | 1.814(2) |
| Si1-N1    | 1.827(2) |
| Si1-C1    | 1.930(2) |
| N1-C3     | 1.339(3) |
| N3-C5     | 1.481(3) |
| N4-C4     | 1.468(3) |
| C3-N2     | 1.341(3) |
| C2-C1     | 1.739(3) |
| C4-C5     | 1.515(3) |
|           |          |
| N4-P1-N3  | 94.5(1)  |
| N4-P1-C2  | 100.0(1) |
| N3-P1-C2  | 98.9(1)  |
| O1-Si1-N2 | 122.1(1) |
| O1-Si1-N1 | 121.2(1) |
| N2-Si1-N1 | 72.5(1)  |
| O1-Si1-C1 | 120.2(1) |
| N2-Si1-C1 | 105.3(1) |
| N1-Si1-C1 | 105.5(1) |

|           |          |
|-----------|----------|
| C5-N3-P1  | 110.7(1) |
| C4-N4-P1  | 111.1(2) |
| N1-C3-N2  | 106.9(2) |
| C3-N2-Si1 | 90.6(1)  |
| C1-C2-P1  | 117.8(1) |
| N3-C5-C4  | 108.2(2) |

---

Symmetry transformations used to generate equivalent atoms:

Compound **6** (CCDC 2075599)

**Table S7** Crystal data and structure refinement for **6**.

|                                   |                                                                                    |                  |
|-----------------------------------|------------------------------------------------------------------------------------|------------------|
| Empirical formula                 | C <sub>28</sub> H <sub>55</sub> B <sub>10</sub> N <sub>4</sub> O <sub>3</sub> P Si |                  |
| Formula weight                    | 662.92                                                                             |                  |
| Temperature                       | 150(2) K                                                                           |                  |
| Wavelength                        | 1.54184 Å                                                                          |                  |
| Crystal system                    | Monoclinic                                                                         |                  |
| Space group                       | P2 <sub>1</sub> /n                                                                 |                  |
| Unit cell dimensions              | a = 9.7706(2) Å                                                                    | α = 90°.         |
|                                   | b = 22.3265(4) Å                                                                   | β = 103.718(2)°. |
|                                   | c = 17.6158(4) Å                                                                   | γ = 90°.         |
| Volume                            | 3733.15(14) Å <sup>3</sup>                                                         |                  |
| Z                                 | 4                                                                                  |                  |
| Density (calculated)              | 1.179 Mg/m <sup>3</sup>                                                            |                  |
| Absorption coefficient            | 1.224 mm <sup>-1</sup>                                                             |                  |
| F(000)                            | 1416                                                                               |                  |
| Crystal size                      | 0.260 x 0.210 x 0.130 mm <sup>3</sup>                                              |                  |
| Theta range for data collection   | 3.254 to 67.495°.                                                                  |                  |
| Index ranges                      | -11 ≤ h ≤ 9, -25 ≤ k ≤ 26, -21 ≤ l ≤ 21                                            |                  |
| Reflections collected             | 14627                                                                              |                  |
| Independent reflections           | 6729 [R(int) = 0.0377]                                                             |                  |
| Completeness to theta = 67.496°   | 100.0 %                                                                            |                  |
| Absorption correction             | Semi-empirical from equivalents                                                    |                  |
| Max. and min. transmission        | 1.00000 and 0.92297                                                                |                  |
| Refinement method                 | Full-matrix least-squares on F <sup>2</sup>                                        |                  |
| Data / restraints / parameters    | 6729 / 0 / 436                                                                     |                  |
| Goodness-of-fit on F <sup>2</sup> | 1.023                                                                              |                  |
| Final R indices [I > 2σ(I)]       | R1 = 0.0423, wR2 = 0.1013                                                          |                  |
| R indices (all data)              | R1 = 0.0601, wR2 = 0.1147                                                          |                  |

Extinction coefficient

n/a

Largest diff. peak and hole

0.369 and -0.276 e.Å<sup>-3</sup>

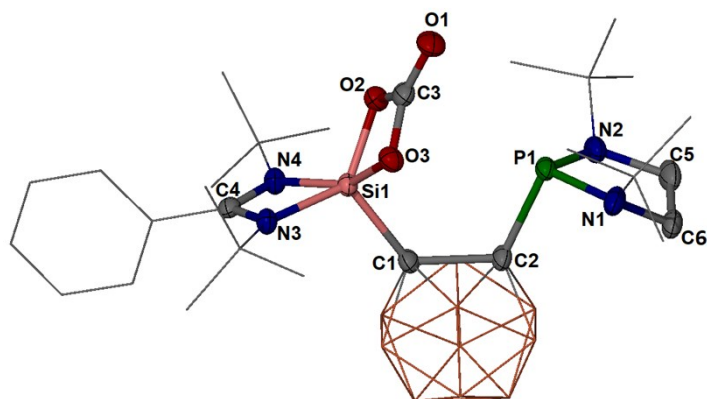

**Fig. S4** Molecular Structure of **6**. Thermal ellipsoids are drawn at 50% probability level. Hydrogen atoms are omitted for clarity. Bond lengths [Å] and angles [°] for **6**.

**Table S8** Bond lengths [Å] and angles [°] for **6**.

|          |          |
|----------|----------|
| P1-N1    | 1.684(2) |
| P1-N2    | 1.708(2) |
| P1-C2    | 1.932(2) |
| Si1-O2   | 1.718(1) |
| Si1-O3   | 1.770(1) |
| Si1-N3   | 1.811(2) |
| Si1-N4   | 1.874(2) |
| Si1-C1   | 1.939(2) |
| Si1-C3   | 2.217(2) |
| Si1-C4   | 2.288(2) |
| O1-C3    | 1.194(2) |
| O2-C3    | 1.362(2) |
| O3-C3    | 1.340(2) |
| N3-C4    | 1.348(3) |
| N1-C6    | 1.472(3) |
| C4-N4    | 1.325(3) |
| N2-C5    | 1.483(3) |
| C5-C6    | 1.516(4) |
| C1-C2    | 1.738(3) |
| N1-P1-N2 | 95.4(1)  |
| N1-P1-C2 | 98.8(1)  |

|           |          |
|-----------|----------|
| N2-P1-C2  | 101.2(1) |
| O2-Si1-O3 | 75.0(1)  |
| O2-Si1-N3 | 132.7(1) |
| O3-Si1-N3 | 98.2(1)  |
| O2-Si1-N4 | 94.8(1)  |
| O3-Si1-N4 | 154.7(1) |
| N3-Si1-N4 | 71.4(1)  |
| O2-Si1-C1 | 117.5(1) |
| O3-Si1-C1 | 102.1(1) |
| N3-Si1-C1 | 109.8(1) |
| N4-Si1-C1 | 103.2(1) |
| O2-Si1-C3 | 37.9(1)  |
| O3-Si1-C3 | 37.2(1)  |
| N3-Si1-C3 | 120.2(1) |
| N4-Si1-C3 | 128.3(1) |
| C1-Si1-C3 | 115.8(1) |
| O2-Si1-C4 | 116.6(1) |
| O3-Si1-C4 | 129.7(1) |
| N3-Si1-C4 | 36.1(1)  |
| N4-Si1-C4 | 35.4(1)  |
| C1-Si1-C4 | 111.8(1) |
| C3-Si1-C4 | 132.4(1) |
| C3-O2-Si1 | 91.3(1)  |
| C3-O3-Si1 | 89.9(1)  |
| C4-N3-Si1 | 91.6(1)  |
| C6-N1-P1  | 109.4(2) |
| N4-C4-N3  | 107.2(2) |
| N4-C4-Si1 | 55.0(1)  |
| N3-C4-Si1 | 52.3(1)  |
| C4-N4-Si1 | 89.6(1)  |
| O1-C3-O3  | 129.3(2) |
| O1-C3-O2  | 126.9(2) |
| O3-C3-O2  | 103.7(2) |
| O1-C3-Si1 | 176.8(2) |
| O3-C3-Si1 | 53.0(1)  |
| O2-C3-Si1 | 50.8(1)  |
| C5-N2-P1  | 110.8(2) |
| C2-C1-Si1 | 123.9(1) |
| C1-C2-P1  | 117.0(1) |



|          |          |
|----------|----------|
| N2-C5-C6 | 107.9(2) |
| N1-C6-C5 | 107.6(2) |

---

Symmetry transformations used to generate equivalent atoms:

Compound 7 (CCDC 2075597)

**Table S9** Crystal data and structure refinement for 7.

|                                   |                                                                                    |                  |
|-----------------------------------|------------------------------------------------------------------------------------|------------------|
| Empirical formula                 | C <sub>28</sub> H <sub>55</sub> B <sub>10</sub> N <sub>4</sub> O <sub>3</sub> P Si |                  |
| Formula weight                    | 662.92                                                                             |                  |
| Temperature                       | 150(2) K                                                                           |                  |
| Wavelength                        | 1.54184 Å                                                                          |                  |
| Crystal system                    | Monoclinic                                                                         |                  |
| Space group                       | P2 <sub>1</sub> /c                                                                 |                  |
| Unit cell dimensions              | a = 16.6462(7) Å                                                                   | α = 90°.         |
|                                   | b = 15.4729(5) Å                                                                   | β = 117.670(6)°. |
|                                   | c = 16.1445(7) Å                                                                   | γ = 90°.         |
| Volume                            | 3682.7(3) Å <sup>3</sup>                                                           |                  |
| Z                                 | 4                                                                                  |                  |
| Density (calculated)              | 1.196 Mg/m <sup>3</sup>                                                            |                  |
| Absorption coefficient            | 1.241 mm <sup>-1</sup>                                                             |                  |
| F(000)                            | 1416                                                                               |                  |
| Crystal size                      | 0.230 x 0.150 x 0.100 mm <sup>3</sup>                                              |                  |
| Theta range for data collection   | 2.998 to 67.500°.                                                                  |                  |
| Index ranges                      | -15 ≤ h ≤ 19, -18 ≤ k ≤ 15, -19 ≤ l ≤ 19                                           |                  |
| Reflections collected             | 18908                                                                              |                  |
| Independent reflections           | 6629 [R(int) = 0.0619]                                                             |                  |
| Completeness to theta = 67.500°   | 99.9 %                                                                             |                  |
| Absorption correction             | Semi-empirical from equivalents                                                    |                  |
| Max. and min. transmission        | 1.00000 and 0.47626                                                                |                  |
| Refinement method                 | Full-matrix least-squares on F <sup>2</sup>                                        |                  |
| Data / restraints / parameters    | 6629 / 15 / 467                                                                    |                  |
| Goodness-of-fit on F <sup>2</sup> | 1.027                                                                              |                  |
| Final R indices [I > 2σ(I)]       | R1 = 0.0523, wR2 = 0.1333                                                          |                  |
| R indices (all data)              | R1 = 0.0746, wR2 = 0.1546                                                          |                  |
| Extinction coefficient            | n/a                                                                                |                  |
| Largest diff. peak and hole       | 0.481 and -0.358 e.Å <sup>-3</sup>                                                 |                  |

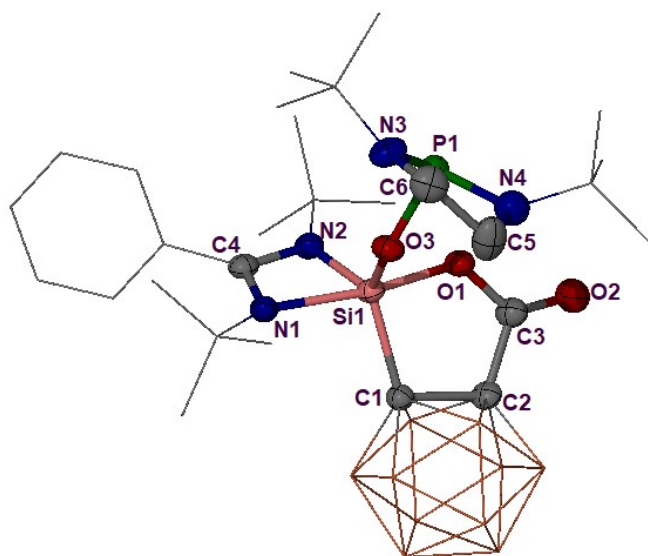

**Fig. S5** Molecular Structure of **7**. Thermal ellipsoids are drawn at 50% probability level. Hydrogen atoms are omitted for clarity. Bond lengths [ $\text{\AA}$ ] and angles [ $^\circ$ ] for **7**.

**Table S10** Bond lengths [ $\text{\AA}$ ] and angles [ $^\circ$ ] for **7**.

---

|          |          |
|----------|----------|
| P1-O3    | 1.666(2) |
| P1-N4    | 1.679(2) |
| P1-N3    | 1.697(2) |
| Si1-O3   | 1.624(1) |
| Si1-O1   | 1.773(2) |
| Si1-N2   | 1.796(2) |
| Si1-C1   | 1.937(3) |
| Si1-N1   | 1.944(2) |
| O1-C3    | 1.314(3) |
| O2-C3    | 1.200(3) |
| N1-C4    | 1.314(3) |
| C1-C2    | 1.652(3) |
| N2-C4    | 1.371(3) |
| C3-C2    | 1.515(4) |
| N3-C6    | 1.470(3) |
| C6-C5    | 1.516(4) |
| N4-C5    | 1.469(4) |
| O3-P1-N4 | 99.8(1)  |
| O3-P1-N3 | 97.9(1)  |

|           |          |
|-----------|----------|
| N4-P1-N3  | 94.1(1)  |
| O3-Si1-O1 | 94.2(1)  |
| O3-Si1-N2 | 120.2(1) |
| O1-Si1-N2 | 97.4(1)  |
| O3-Si1-C1 | 120.6(1) |
| O1-Si1-C1 | 88.2(1)  |
| N2-Si1-C1 | 118.3(1) |
| O3-Si1-N1 | 92.2(1)  |
| O1-Si1-N1 | 167.8(1) |
| N2-Si1-N1 | 70.5(1)  |
| C1-Si1-N1 | 97.5(1)  |
| C3-O1-Si1 | 123.9(2) |
| Si1-O3-P1 | 134.7(1) |
| C4-N1-Si1 | 88.8(2)  |
| C2-C1-Si1 | 106.2(2) |
| C4-N2-Si1 | 93.4(2)  |
| O2-C3-O1  | 125.5(2) |
| O2-C3-C2  | 122.4(2) |
| O1-C3-C2  | 112.1(2) |
| C6-N3-P1  | 112.5(2) |
| N1-C4-N2  | 107.1(2) |
| C3-C2-C1  | 109.5(2) |
| N3-C6-C5  | 105.9(2) |
| C5-N4-P1  | 109.0(2) |
| N4-C5-C6  | 107.3(2) |

---

Symmetry transformations used to generate equivalent atoms:

## B. References

1. R. B. King, P. M. Sundaram, Bis(dialkylamino)phosphines. *J. Org. Chem.* **1984**, *49*, 1784-1789.
2. S. S. Sen, H. W. Roesky, D. Stern, J. Henn, D. Stalke, High Yield Access to Silylene RSiCl (R) PhC(NtBu)<sub>2</sub> and Its Reactivity toward Alkyne: Synthesis of Stable Disilacyclobutene. *J. Am. Chem. Soc.* **2010**, *132*, 1123-1126.
3. Y.-P. Zhou, S. Raoufmoqhaddam, T. Szilvási, M. Driess. A Bis(silylene)-Substituted ortho-Carborane as a Superior Ligand in the Nickel-Catalyzed Amination of Arenes. *Angew. Chem. Int. Ed.* **2016**, *55*, 12868-12872
4. Y. Xiong, D. D. Chen, S. Yao, J. Guo, A. Ruzika, and M. Driess. New Types of Ge<sub>2</sub> and Ge<sub>4</sub> Assemblies Stabilized by a Carbanionic Dicarborandiyl-Silylene Ligand, accepted by *JACS*. <https://doi.org/10.1021/jacs.1c01722>.
5. Sheldrick, G. M. *SHELX-97 Program for Crystal Structure Determination*, Universität Göttingen, Germany (1997).
